# Supplementary material
Source: PubMed Central journal article supplement (PMC7033656)
Supplement: am9b18920_si_001.pdf [file am9b18920_si_001.pdf]

# Supporting information: High-performance planar thin film thermochromic window via dynamic optical impedance matching

Christian Sol<sup>1</sup>, Mark Portnoi<sup>1</sup>, Tao Li<sup>1</sup>, Kargal L. Gurunatha<sup>1</sup>, Johannes Schläfer<sup>1</sup>, Stefan Guldin<sup>2</sup>, Ivan P. Parkin<sup>3</sup>, and Ioannis Papakonstantinou\*<sup>1</sup>

<sup>1</sup>Photonic Innovations Lab, Department of Electronic & Electrical Engineering, University College London, Torrington Place, London WC1E 7JE, United Kingdom

<sup>2</sup>Department of Chemical Engineering, University College London, Torrington Place, London, WC1E 7JE, United Kingdom

<sup>3</sup>Department of Chemistry, University College London, 20 Gordon Street, London WC1H 0AJ, United Kingdom

\*i.papakonstantinou@ucl.ac.uk

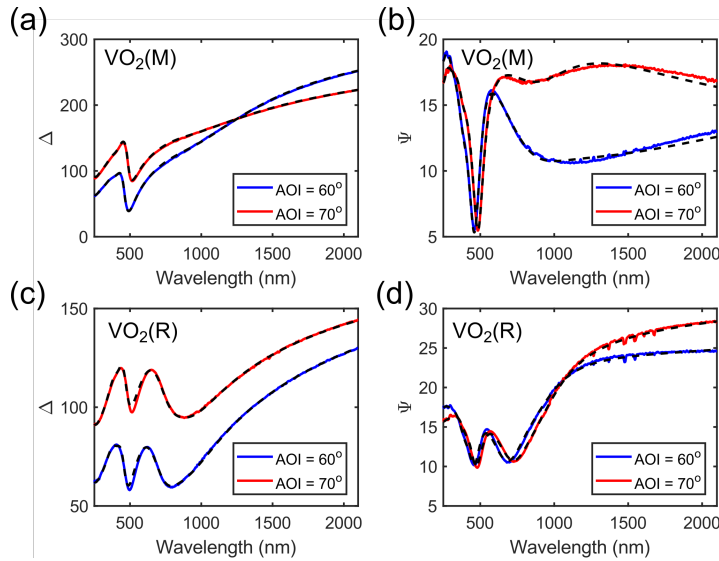

Figure S1: (a-d) Measured ellipsometric parameters  $\Delta$  (a, c) and  $\Psi$  (b, d) for a single  $\text{VO}_2$  thin film along with corresponding theoretical fitting for 96 nm thickness using  $\text{VO}_2(\text{M})$  (a, b) and  $\text{VO}_2(\text{R})$  (c, d) optical constants as shown in the main text for multiple angles of incidence (AOI) normal from the sample surface.

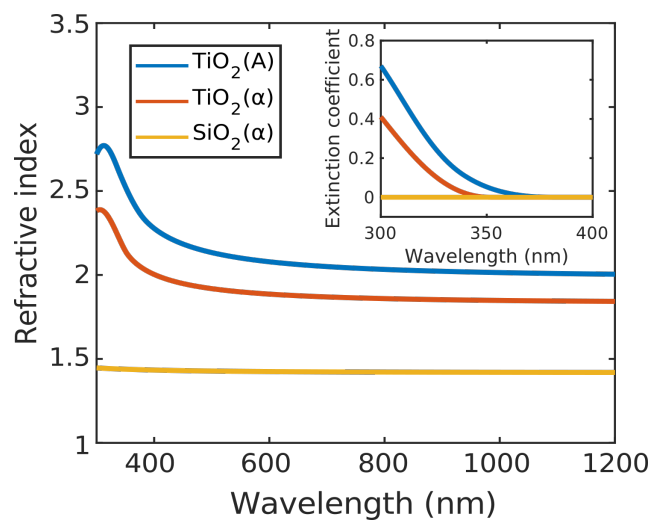

Figure S2: Optical constants of impedance matching layers as derived from ellipsometry.

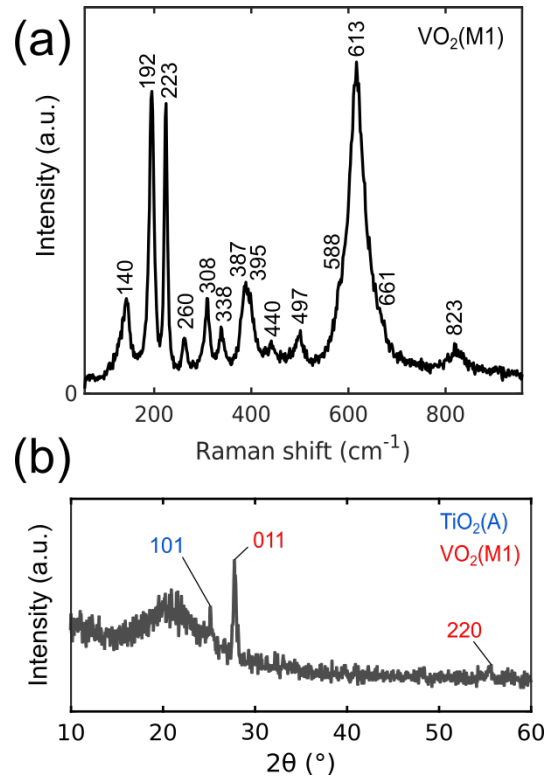

Figure S3: Identification of crystalline material phases within the sample. (a) Raman spectrum of sample. The peaks at  $\sim 140, 192, 223, 260, 308, 338, 387, 395, 440, 482, 497, 588, 613, 661$  and  $823 \text{ cm}^{-1}$  are assigned to the  $\text{VO}_2(\text{M1})$  phase[1, 2, 3]. The broad peak at  $\sim 613 \text{ cm}^{-1}$  is a convolution of the peaks at  $588, 613$  and  $661 \text{ cm}^{-1}$ . The low frequency phonons at  $192$  and  $223 \text{ cm}^{-1}$  correspond to lattice motion involving V-V bonds[4], whilst the peak at  $140 \text{ cm}^{-1}$  has previously been attributed to soft-phonon vibrations[2, 5]. The rest of the peaks are assigned to vibrational modes of V-O bonds[4, 6]. (b) X-ray diffraction spectrum of sample showing peaks for both  $\text{TiO}_2(\text{A})$  (101)[7] and  $\text{VO}_2(\text{M1})$  (011, 220)[8, 9].

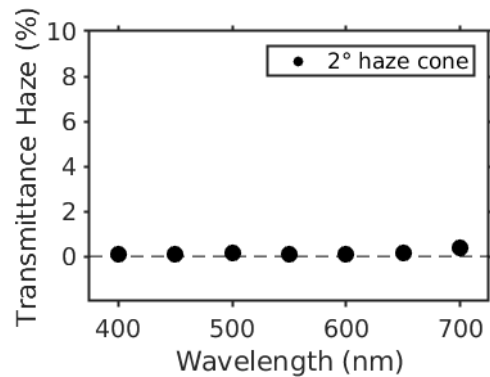

Figure S4: Characterisation of visible haze. Fraction of the transmitted light that is outside  $2^\circ$  from normal is below 0.5% across the full visible range.

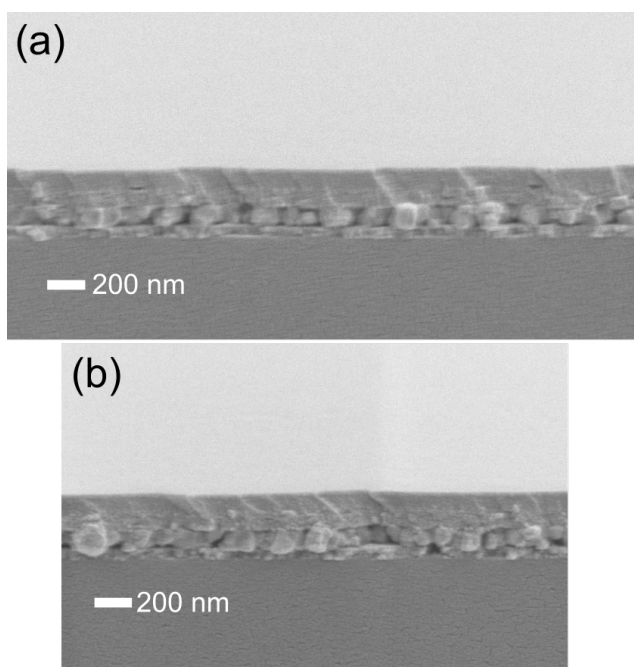

Figure S5: Additional electron microscopy images of fabricated structure. (a) Side-on image at 93000x magnification (b) Side-on image at 117000x magnification.

## References

- [1] Pan, M. *et al.* Raman study of the phase transition in VO<sub>2</sub> thin films. *Journal of Crystal Growth* **268**, 178–183 (2004).
- [2] Schilbe, P. Raman scattering in VO<sub>2</sub>. *Physica B: Condensed Matter* **316**, 600–602 (2002).
- [3] Petrov, G., Yakovlev, V. & Squier, J. Raman microscopy analysis of phase transformation mechanisms in vanadium dioxide. *Applied Physics Letters* **81**, 1023–1025 (2002).
- [4] Marini, C. *et al.* Optical properties of V<sub>1-x</sub>Cr<sub>x</sub>O<sub>2</sub> compounds under high pressure. *Physical Review B* **77**, 235111 (2008).
- [5] Goncharuk, I., Ilinskiy, A., Kvashenkina, O. & Shadrin, E. Electron-electron correlations in Raman spectra of VO<sub>2</sub>. *Physics of the Solid State* **55**, 164–174 (2013).
- [6] Ureña-Begara, F., Crunteanu, A. & Raskin, J.-P. Raman and XPS characterization of vanadium oxide thin films with temperature. *Applied Surface Science* **403**, 717–727 (2017).
- [7] Ye, L. *et al.* Synthesis of anatase TiO<sub>2</sub> nanocrystals with {101}, {001} or {010} single facets of 90% level exposure and liquid-phase photocatalytic reduction and oxidation activity orders. *Journal of Materials Chemistry A* **1**, 10532–10537 (2013).
- [8] Cao, X. *et al.* Solution-based fabrication of VO<sub>2</sub>(M) nanoparticles via lyophilisation. *RSC Advances* **5**, 25669–25675 (2015).
- [9] Jo, Y., Kim, M. & Kim, B. Direct correlation of structural and electrical properties of electron-doped individual VO<sub>2</sub> nanowires on devised TEM grids. *Nanotechnology* **27**, 435704–435704 (2016).
